# Supplementary material for: Controlled fragrance release from galactose-based pro-fragrances
Source: Royal Society of Chemistry journal article supplement (doi:10.1039/c4ra07728h), 2014-01-01
Supplement: c4ra07728h1.pdf [file c4ra07728h1.pdf]

## Supporting Information

# Controlled fragrance release from galactose-based pro- fragrances

**Tobias Kuhnt<sup>a</sup>, Andreas Herrmann<sup>b</sup>, Daniel Benczedi<sup>b</sup>, Christoph Weder<sup>a\*</sup> and E. Johan Foster<sup>a,c\*</sup>**

<sup>a</sup>Adolphe Merkle Institute, University of Fribourg, Chemin des Verdiers 4, CH-1700 Fribourg, Switzerland

<sup>b</sup>Firmenich SA, Division Recherche et Développement, B.P. 239, CH-1211 Genève 8, Switzerland

<sup>c</sup>Virginia Tech, Department of Materials Science & Engineering, 445 Old Turner Street, 213 Holden Hall,  
Blacksburg VA 24061, USA

# NMR-Spectra:

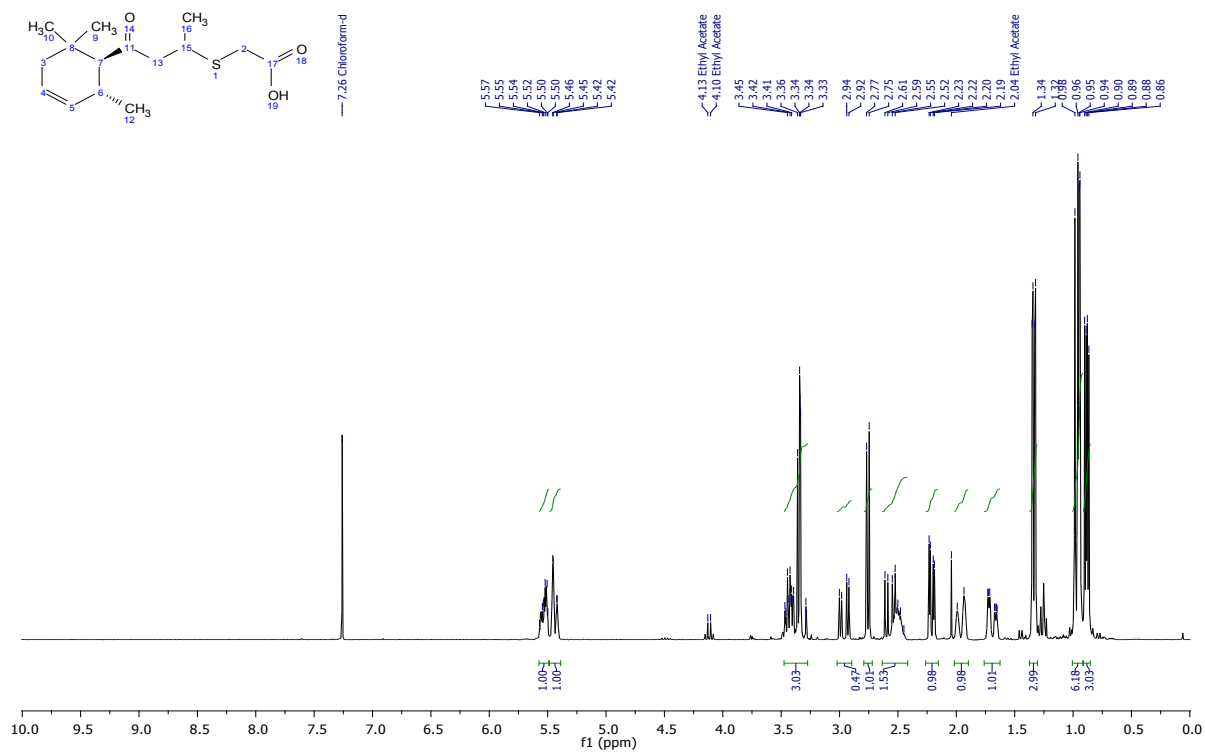

**Figure S 1.** <sup>1</sup>H-NMR of (±)-2-((4-Oxo-4-((1*RS*,2*SR*)-2,6,6-trimethylcyclohex-3-en-1-yl)butan-2-yl)thio)acetic acid (**1**) in CDCl<sub>3</sub> at 300 MHz.

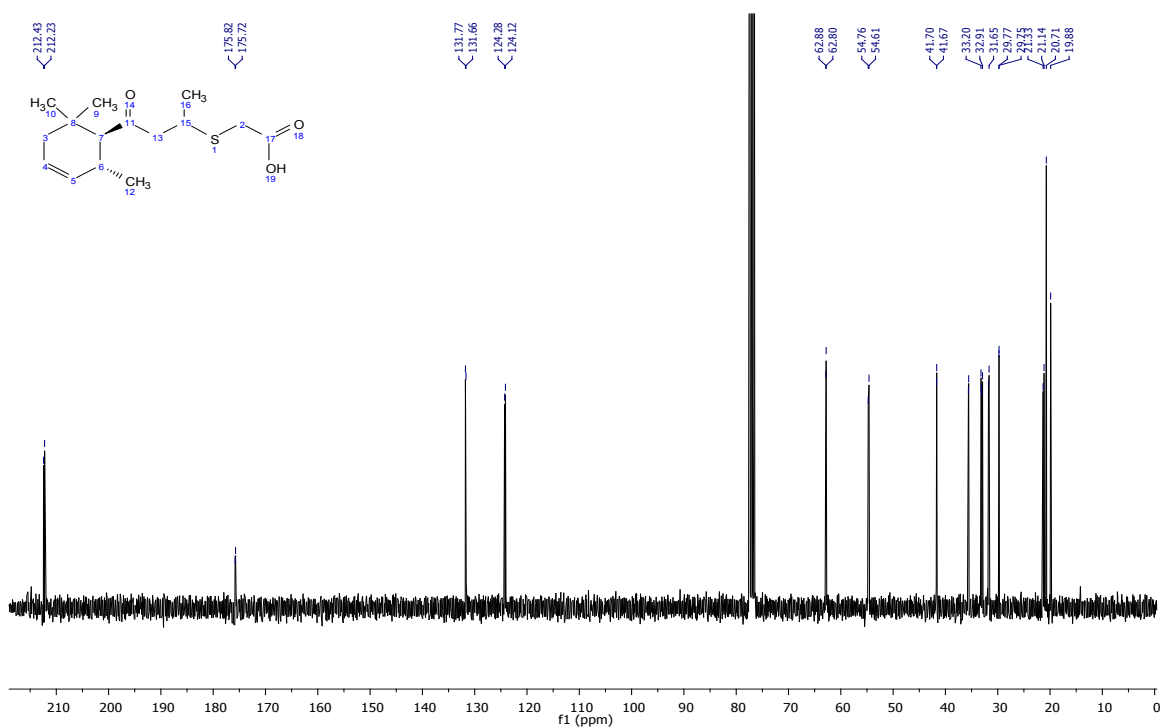

**Figure S 2.**  $^{13}\text{C}$ -NMR of ( $\pm$ )-2-((4-Oxo-4-((1*R*,2*S**R*)-2,6,6-trimethylcyclohex-3-en-1-yl)butan-2-yl)thio)acetic acid (**1**) in  $\text{CDCl}_3$  at 300 MHz.

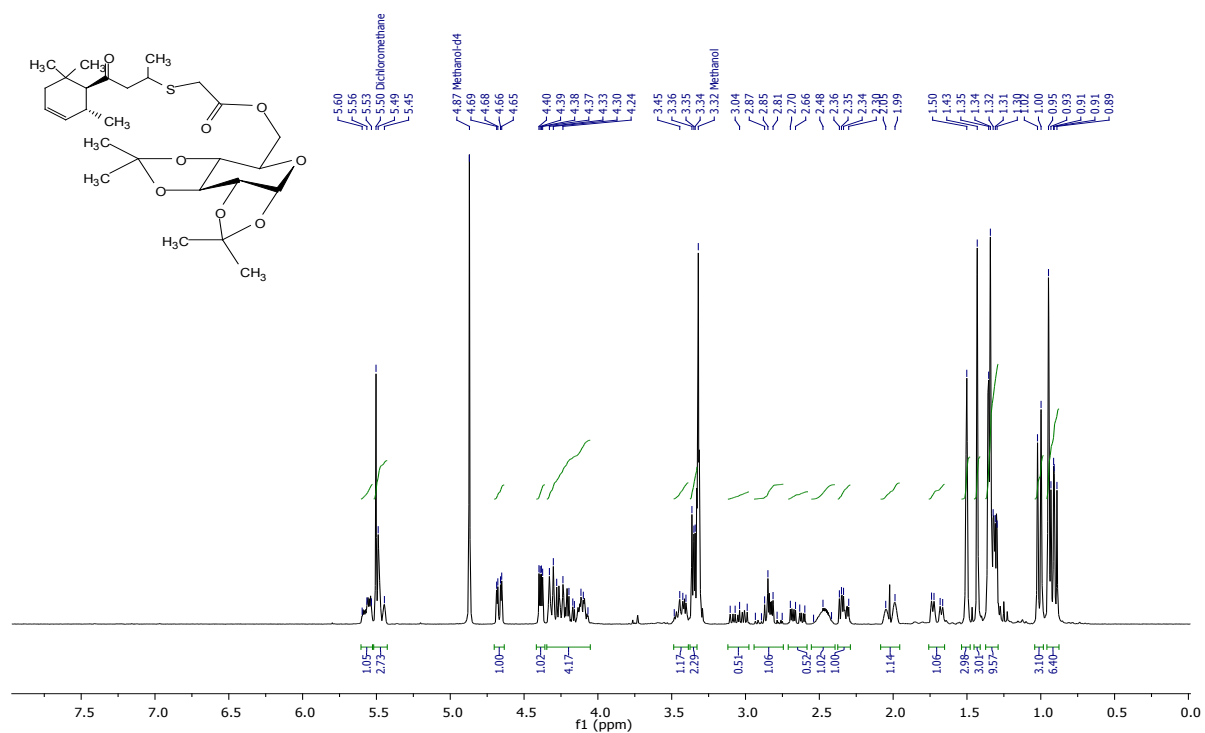

**Figure S 3.**  $^1\text{H}$ -NMR of ((3*aR*,5*R*,5*aR*,8*aS*,8*bR*)-2,2,7,7-Tetramethyltetrahydro-3*aH*-bis([1,3]dioxolo)[4,5-*b*:4',5'-*d*]pyran-5-yl)methyl 2-((4-oxo-4-((1*R*,2*S**R*)-2,6,6-trimethylcyclohex-3-en-1-yl)butan-2-yl)thio)acetate (**2**) in  $\text{MeOH-D}_4$  at 300 MHz.

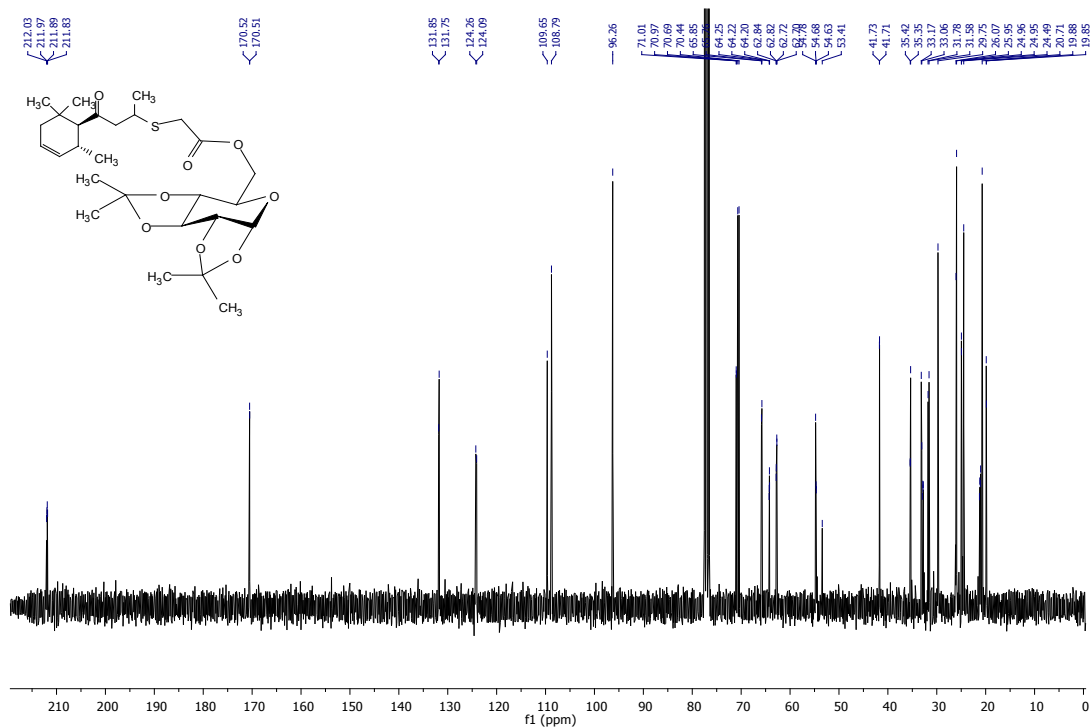

**Figure S 4.**  $^{13}\text{C}$ -NMR of ((3*aR*,5*R*,5*aR*,8*aS*,8*bR*)-2,2,7,7-Tetramethyltetrahydro-3*aH*-bis([1,3]dioxolo)[4,5-*b*:4',5'-*d*]pyran-5-yl)methyl 2-((4-oxo-4-((1*RS*,2*SR*)-2,6,6-trimethylcyclohex-3-en-1-yl)butan-2-yl)thio)acetate (**2**) in  $\text{CDCl}_3$  at 300 MHz.

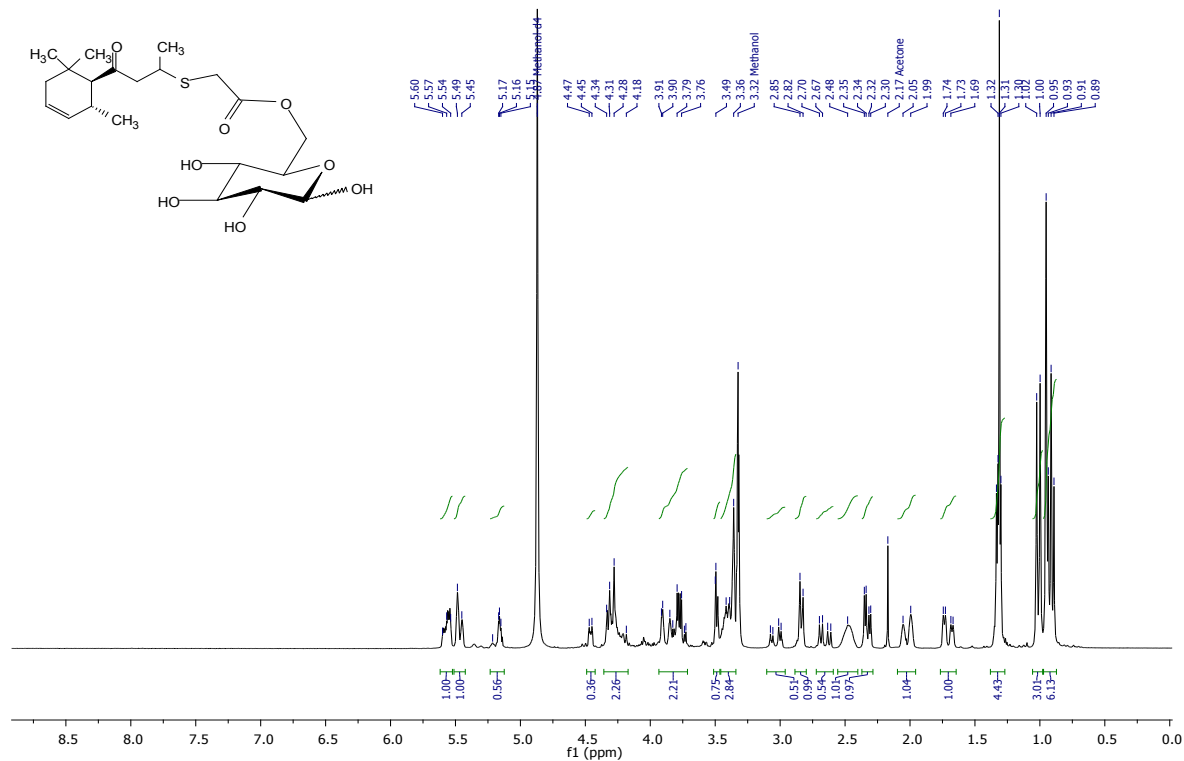

**Figure S 5.**  $^1\text{H}$ -NMR of ((2*R*,3*S*,4*S*,5*R*,6*S*)-3,4,5,6-Tetrahydroxytetrahydro-2*H*-pyran-2-yl)methyl 2-((4-oxo-4-((1*RS*,2*SR*)-2,6,6 trimethylcyclohex-3-en-1-yl)butan-2-yl)thio)acetate (**3**) in  $\text{MeOH-D}_4$  at 300 MHz.

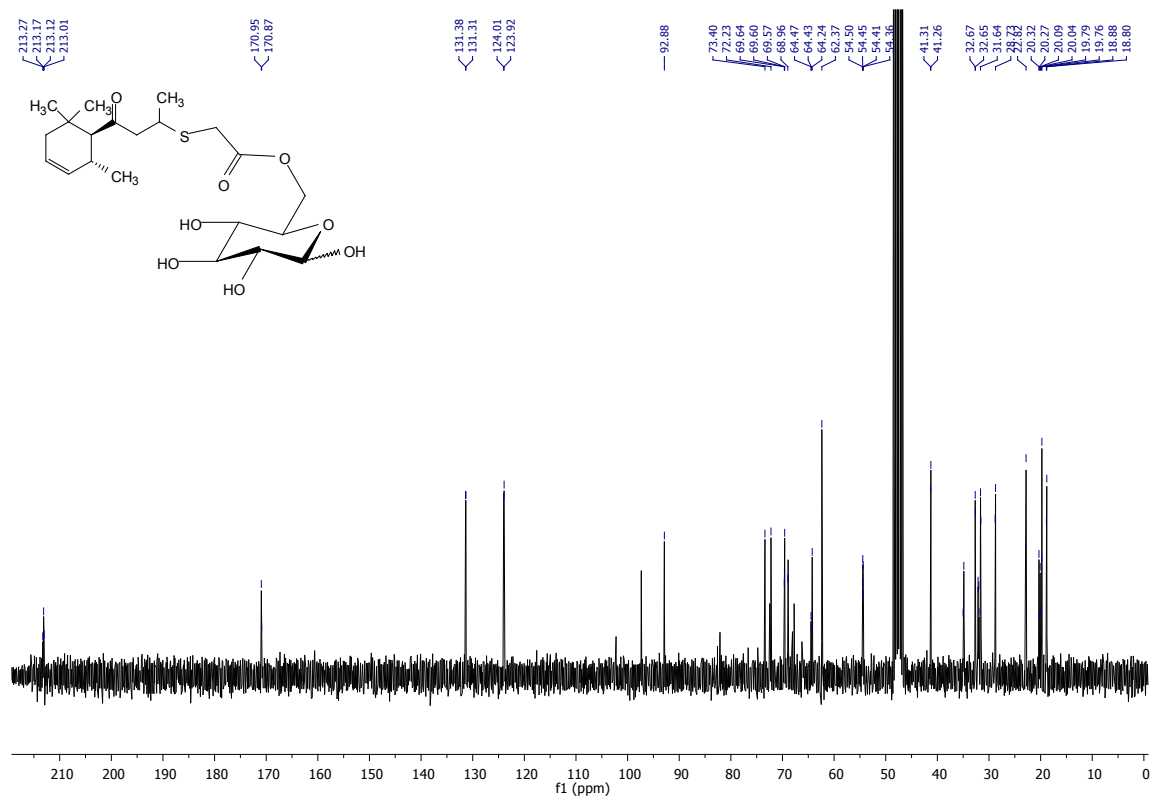

**Figure S 6.**  $^{13}\text{C}$ -NMR of ((2*R*,3*S*,4*S*,5*R*,6*S*)-3,4,5,6-Tetrahydroxytetrahydro-2*H*-pyran-2-yl)methyl 2-((4-oxo-4-((1*R*,2*S*)-2,6,6 trimethylcyclohex-3-en-1-yl)butan-2-yl)thio)acetate (**3**) in MeOH- $\text{D}_4$  at 300 MHz.

IR spectra:

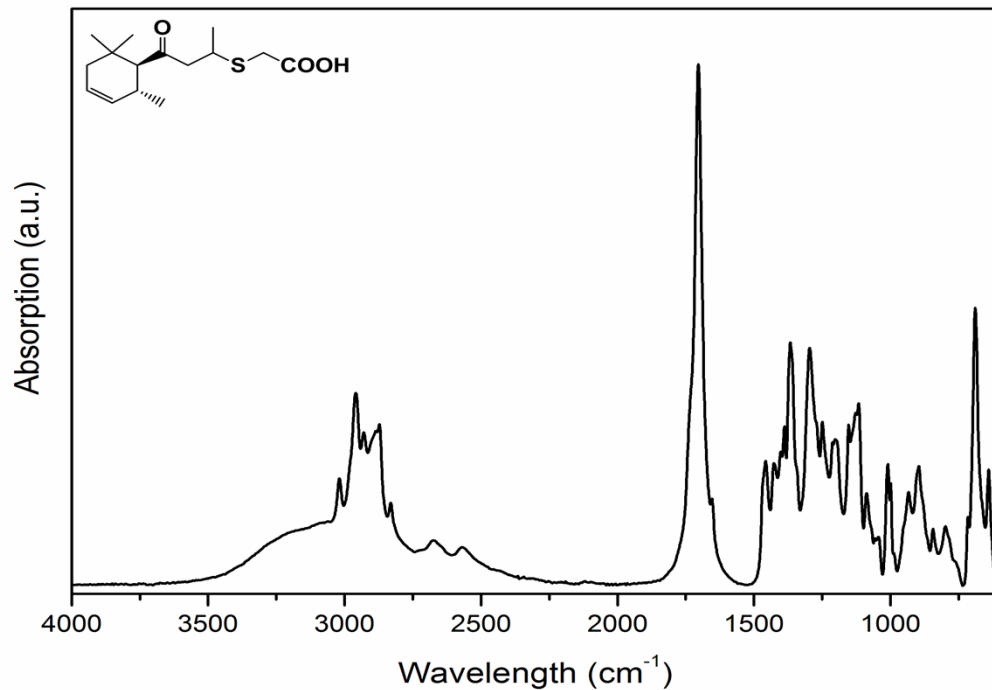

Figure S 7. IR spectra of  $(\pm)$ -2-((4-Oxo-4-((1*RS*,2*SR*)-2,6,6-trimethylcyclohex-3-en-1-yl)butan-2-yl)thio)acetic acid (**1**).

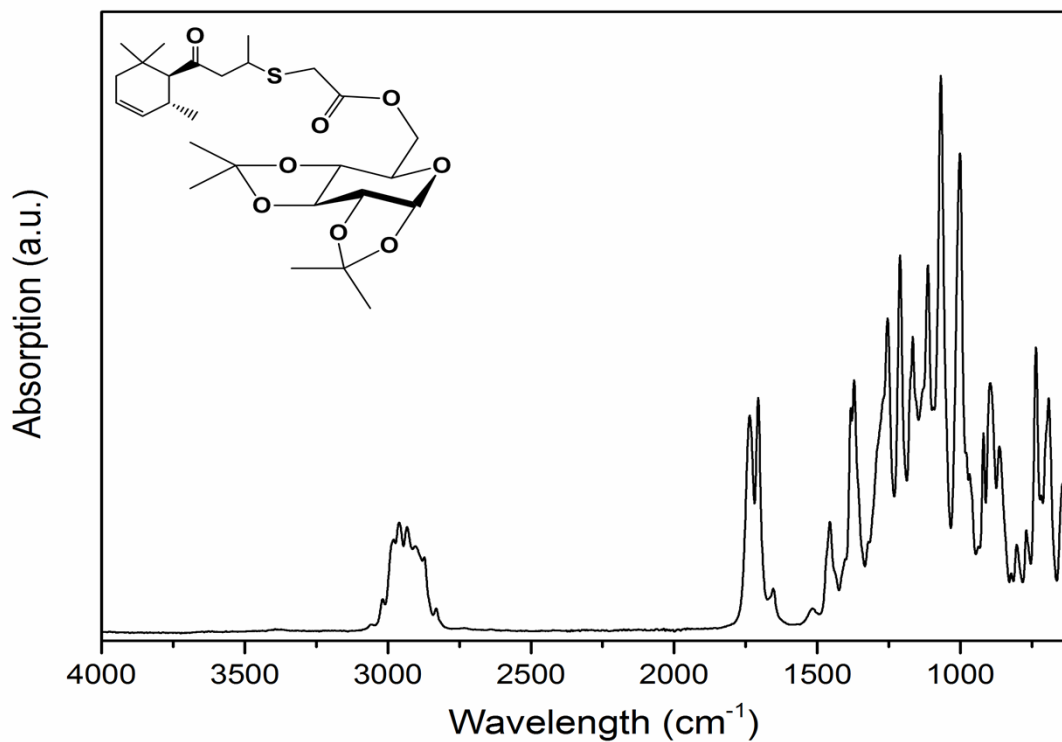

Figure S 8. IR spectra of ((3*aR*,5*R*,5*aR*,8*aS*,8*bR*)-2,2,7,7-Tetramethyltetrahydro-3*aH*-bis([1,3]dioxolo)[4,5-*b*:4',5'-*d*]pyran-5-yl)methyl 2-((4-oxo-4-((1*RS*,2*SR*)-2,6,6-trimethylcyclohex-3-en-1-yl)butan-2-yl)thio)acetate (**2**).

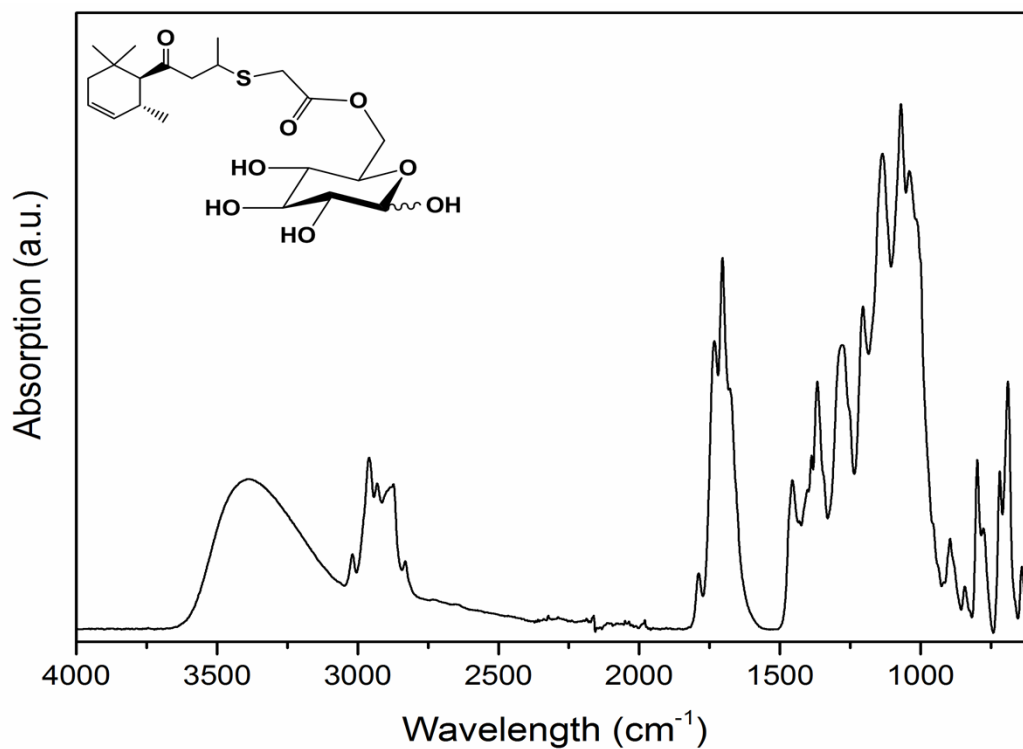

**Figure S 9.** IR spectra of ((2*R*,3*S*,4*S*,5*R*,6*S*)-3,4,5,6-Tetrahydroxytetrahydro-2H-pyran-2-yl)methyl 2-((4-oxo-4-((1*R*,2*S*)-2,6,6 trimethylcyclohex-3-en-1-yl)butan-2-yl)thio)acetate (**3**).

**GCMS Spectra:**

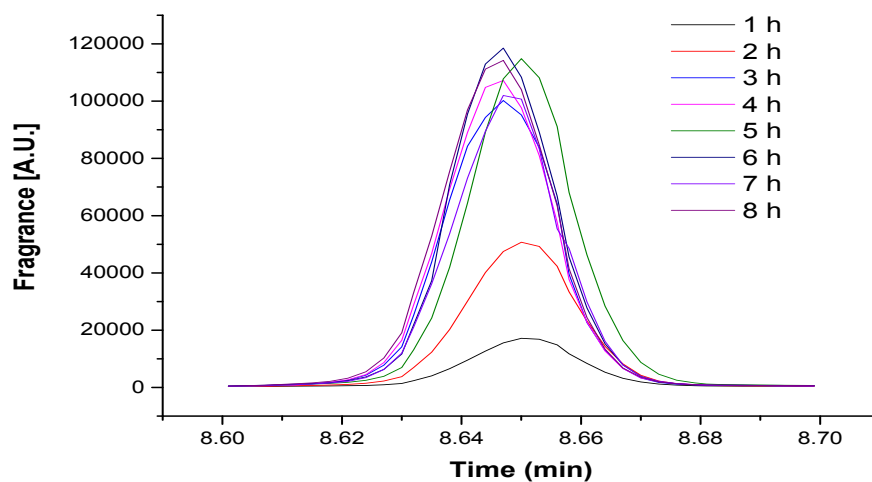

**Figure S 10.** Overlaid GC traces, showing the released fragrance for the 8 recorded time intervals from the protected pro-fragrance in the softener test.

**Buffer preparation:**

Buffer solutions (10 mL) were prepared according to previous established protocols<sup>1</sup> using reagent grade chemicals from Sigma-Aldrich: boric acid (anhydrous), citric acid (anhydrous), sodium hydrogen phosphate ( $\text{Na}_2\text{HPO}_4$ ), monopotassium phosphate ( $\text{KH}_2\text{PO}_4$ ), sodium hydroxide (NaOH) and deuterium oxide ( $\text{D}_2\text{O}$ ). A 0.1 M sodium hydroxide solution was prepared by dissolving 0.4 g NaOH in 10 mL of  $\text{D}_2\text{O}$ . A buffer of pH 4 was prepared by dissolving 107.5 mg of citric acid, 25.7 mg NaCl and 0.68 mL  $\text{NaOH}_{\text{aq}}$  (0.1 M) in 10 mL of  $\text{D}_2\text{O}$ . The buffer of pH 7 was prepared by dissolving 35.2 mg  $\text{KH}_2\text{PO}_4$  and 72.6 mg  $\text{Na}_2\text{HPO}_4$  in  $\text{D}_2\text{O}$  (10 mL). Buffer of pH 10 was prepared by dissolving 47.7 mg of boric acid and 1.8 mL of  $\text{NaOH}_{\text{aq}}$  (0.1 M) in  $\text{D}_2\text{O}$  (10 mL).

1. W. R. Carmody, *Journal of Chemical Education*, 1961, **38**, 559-560.
